# Supplementary material for: HLA-DR Expression in Natural Killer Cells Marks Distinct Functional States, Depending on Cell Differentiation Stage
Source: MDPI journal article supplement (doi:10.3390/ijms25094609), 2024-04-23
Supplement: s1 [file s1]

# Supplementary Material

## Supplementary Figures

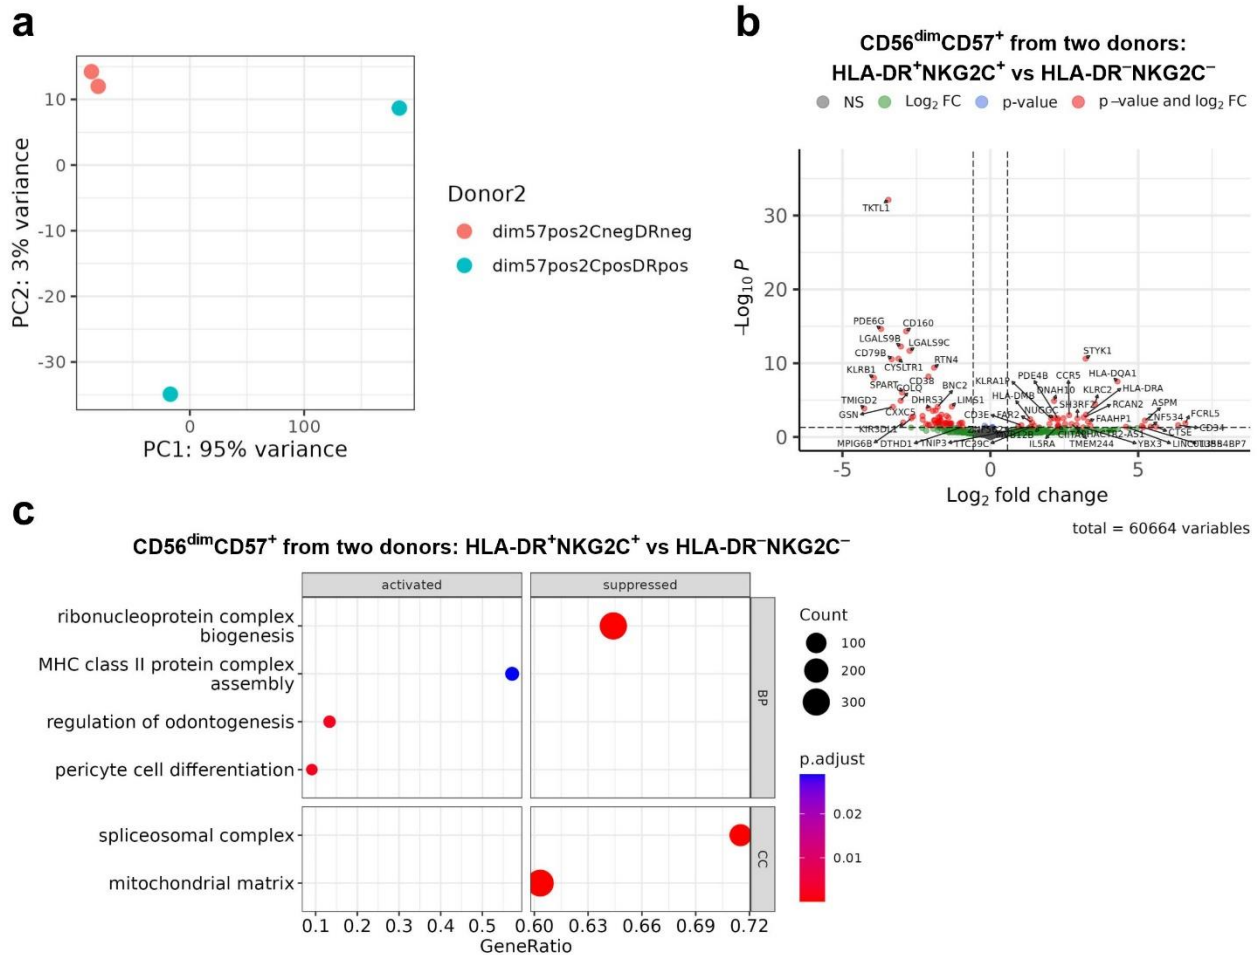

**Figure S1.** Transcriptome analysis of CD56<sup>dim</sup>CD57<sup>+</sup> samples (a) Principal component analysis of normalized count of CD56<sup>dim</sup>CD57<sup>+</sup> samples of donor 2; (b) Volcano plot comparing HLA-DR<sup>+</sup>NKG2C<sup>+</sup> vs HLA-DR<sup>-</sup>NKG2C<sup>-</sup> CD56<sup>dim</sup>CD57<sup>+</sup> NK cells from two donors, part of significant up-regulated and down-regulated genes are labeled. (c) Dotplot of GeneOntology gene set enrichment analysis of HLA-DR<sup>+</sup>NKG2C<sup>+</sup> vs HLA-DR<sup>-</sup>NKG2C<sup>-</sup> CD56<sup>dim</sup>CD57<sup>+</sup> NK cells of two donors, where y-axis represents GO molecular pathways (Biological Processes (BP) Cellular Component (CC)), separated by sign and x-axis gene ratio. The greater the size of a circle the greater the number of genes involved in a pathway the circles are colored based on p-adjusted value.
